# Supplementary material
Source: PubMed Central journal article supplement (PMC6601105)
Supplement: 2018.207316.CHEAH_SUPPL.pdf [file 2018.207316.CHEAH_SUPPL.pdf]

**A novel germline SAMD9L mutation in a family with ataxia-pancytopenia syndrome and pediatric acute lymphoblastic leukemia**

Jesse J.C. Cheah,<sup>1,2,3,\*</sup> Anna L. Brown,<sup>1,2,3,4,\*</sup> Andreas W. Schreiber,<sup>5,6</sup> Jinghua Feng,<sup>6</sup> Milena Babić,<sup>4</sup> Sarah Moore,<sup>4</sup> Chun-Chun Young,<sup>4</sup> Miriam Fine,<sup>7</sup> Kerry Phillips,<sup>7</sup> Michael Guandalini,<sup>8</sup> Peter Wilson,<sup>9</sup> Nicola Poplawski,<sup>4,7</sup> Christopher N. Hahn,<sup>1,2,3,10,\*</sup> and Hamish S. Scott<sup>1,2,3,5,6,10,\*</sup>

*\*JJCC, ALB, CNH and HSS contributed equally to this work.*

<sup>1</sup>Department of Genetics and Molecular Pathology, SA Pathology, Adelaide, SA; <sup>2</sup>Centre for Cancer Biology, SA Pathology and University of South Australia, Adelaide, SA; <sup>3</sup>School of Pharmacy and Medical Sciences, Division of Health Sciences, University of South Australia, Adelaide, SA; <sup>4</sup>School of Paediatrics and Reproductive Health, University of Adelaide, Adelaide, SA; <sup>5</sup>School of Biological Sciences, University of Adelaide, Adelaide, SA; <sup>6</sup>ACRF Cancer Genomics Facility, Centre for Cancer Biology, SA Pathology, Adelaide, SA; <sup>7</sup>Adult Genetics Unit, Royal Adelaide Hospital, University of Adelaide, Adelaide, SA; <sup>8</sup>Children's Health Queensland Hospital and Health Service, Lady Cilento Children's Hospital Brisbane, Brisbane, QLD; <sup>9</sup>Children's Cancer Services, Lady Cilento Children's Hospital Brisbane, Brisbane, QLD and <sup>10</sup>School of Medicine, University of Adelaide, Adelaide, SA, Australia

Correspondence: HAMISH S. SCOTT.

hamish.scott@sa.gov.au.

doi:10.3324/haematol.2018.207316

## Supplementary Materials and Methods

### Ethics

Clinical information and samples were collected with informed consent from all subjects and approval through institutional human ethics review board-approved protocols from the Australian Familial Haematological Cancer Study (AFHCS) (Royal Adelaide Hospital (RAH) #091203 and #100702, and Children, Youth and Women's Health Service #REC1542/12/12, Adelaide, South Australia, Australia), and conducted in accordance with the Declaration of Helsinki.

### Patients and Samples:

Blood and hair samples were obtained with consent from all living descendants of the family as part of the Australia Familial Haematological Cancer Study (AFHCS).

### Sanger Sequencing of *SAMD9L* gene

gDNA was isolated from hair bulbs, peripheral blood mononuclear cells (PBMNC) or lymphoblastic cell lines (LCL). PBMNC or LCL DNA for WES and Sanger sequencing and hair DNA for Sanger sequencing only. *SAMD9L* coding regions were Sanger sequenced to confirm WES variants and for segregation in other relatives.

| Primer name      | Sequence                           |
|------------------|------------------------------------|
| SAMD9L S1473N F  | 5'- AACTCCGAGAGGTCTTGCAATTTGT -3'  |
| SAMD9L S1473N R  | 5'- CTTGCCTTCAGCCTGACCAGTTAGA -3'  |
| SAMD9L E461Vfs F | 5'- CTCATAGGAAACCGAGACTCACTGGA -3' |
| SAMD9L E461Vfs R | 5'- CCAGCTGGGCTGTTGGTAAAGATT -3'   |
| SAMD9L S608Tfs F | 5'- GAAAGCCCAGGAGATCCACTCATT -3'   |
| SAMD9L S608Tfs R | 5'- CCAGTGCAGTCAAGACATCCTCTTTC -3' |

### Whole Exome Sequencing (WES)

WES was performed on DNA from three affected individuals, III-1 (LCL), IV-1 (LCL) and IV-2 (PBMNC) using the Illumina HiSeq2500. Reads were mapped against human genome build GRCh37/hg19. WES was performed and analysed at the ACRF Cancer Genomics Facility as previously described.<sup>1</sup>

Investigation of variants present in both individuals in heterozygosity utilised population databases identifying variants which were rare (<0.1% in ExAC), predicted damaging (CADD>10), with good conservation (GERP>3). This variant filtration identified 19 variants.

### **Cytogenetic Evaluation**

Copy Number Variation (CNV) was assessed in three affected individuals (III-1, IV-1, IV-2) using high density SNP array (Illumina 850K assay chip). Data was analysed and visualized using BlueFuse Multi Software (Illumina).

### **Long Range PCR Clonal Analysis**

Isolated LCL gDNA from individual IV-1 was amplified using Long Amp Taq DNA Polymerase (New England Biolabs) and Sanger sequencing primers: SAMD9L S1473N R (5'-CTTGCCTTCAGCCTGACCAGTTAGA-3') and SAMD9L S608Tfs F (5'-GAAAGCCCAGGAGATCCACTCATT-3'). Amplified regions were cloned into pGEM-T (Promega) and transduced into supplied XL-10 competent cells. Positive transduced cells were cultured, lysed and Sanger sequenced to determine genotype of cloned fragment.

### **Supplementary References**

1. Hahn CN, Ross DM, Feng J, et al. A tale of two siblings: two cases of AML arising from a single pre-leukemic DNMT3A mutant clone. *Leukemia*. 2015;29(10):2101-2104.
2. Schwartz JR, Ma J, Lamprecht T, et al. The genomic landscape of pediatric myelodysplastic syndromes. *Nat Commun*. 2017;8(1):1557.
3. Bluteau O, Sebert M, Leblanc T, et al. A landscape of germ line mutations in a cohort of inherited bone marrow failure patients. *Blood*. 2018;131(7):717-732.
4. Shima H, Koehler K, Nomura Y, et al. Two patients with MIRAGE syndrome lacking haematological features: role of somatic second-site reversion SAMD9 mutations. *J Med Genet*. 2018;55(2):81-85.
5. Schwartz JR, Wang S, Ma J, et al. Germline SAMD9 mutation in siblings with monosomy 7 and myelodysplastic syndrome. *Leukemia*. 2017;31(8):1827-1830.
6. Tesi B, Davidsson J, Voss M, et al. Gain-of-function SAMD9L mutations cause a syndrome of cytopenia, immunodeficiency, MDS, and neurological symptoms. *Blood*. 2017;129(16):2266-2279.

7. Chen DH, Below JE, Shimamura A, et al. Ataxia-Pancytopenia Syndrome Is Caused by Missense Mutations in SAMD9L. *Am J Hum Genet.* 2016;98(6):1146-1158.
8. Buonocore F, Kuhnen P, Suntharalingham JP, et al. Somatic mutations and progressive monosomy modify SAMD9-related phenotypes in humans. *J Clin Invest.* 2017;127(5):1700-1713.
9. Narumi S, Amano N, Ishii T, et al. SAMD9 mutations cause a novel multisystem disorder, MIRAGE syndrome, and are associated with loss of chromosome 7. *Nat Genet.* 2016;48(7):792-797.
10. Wong JC, Bryant V, Lamprecht T, et al. Germline SAMD9 and SAMD9L mutations are associated with extensive genetic evolution and diverse hematologic outcomes. *JCI Insight.* 2018;3(14).
11. Pastor VB, Sahoo SS, Boklan J, et al. Constitutional SAMD9L mutations cause familial myelodysplastic syndrome and transient monosomy 7. *Haematologica.* 2018;103(3):427-437.

## Supplementary Figures

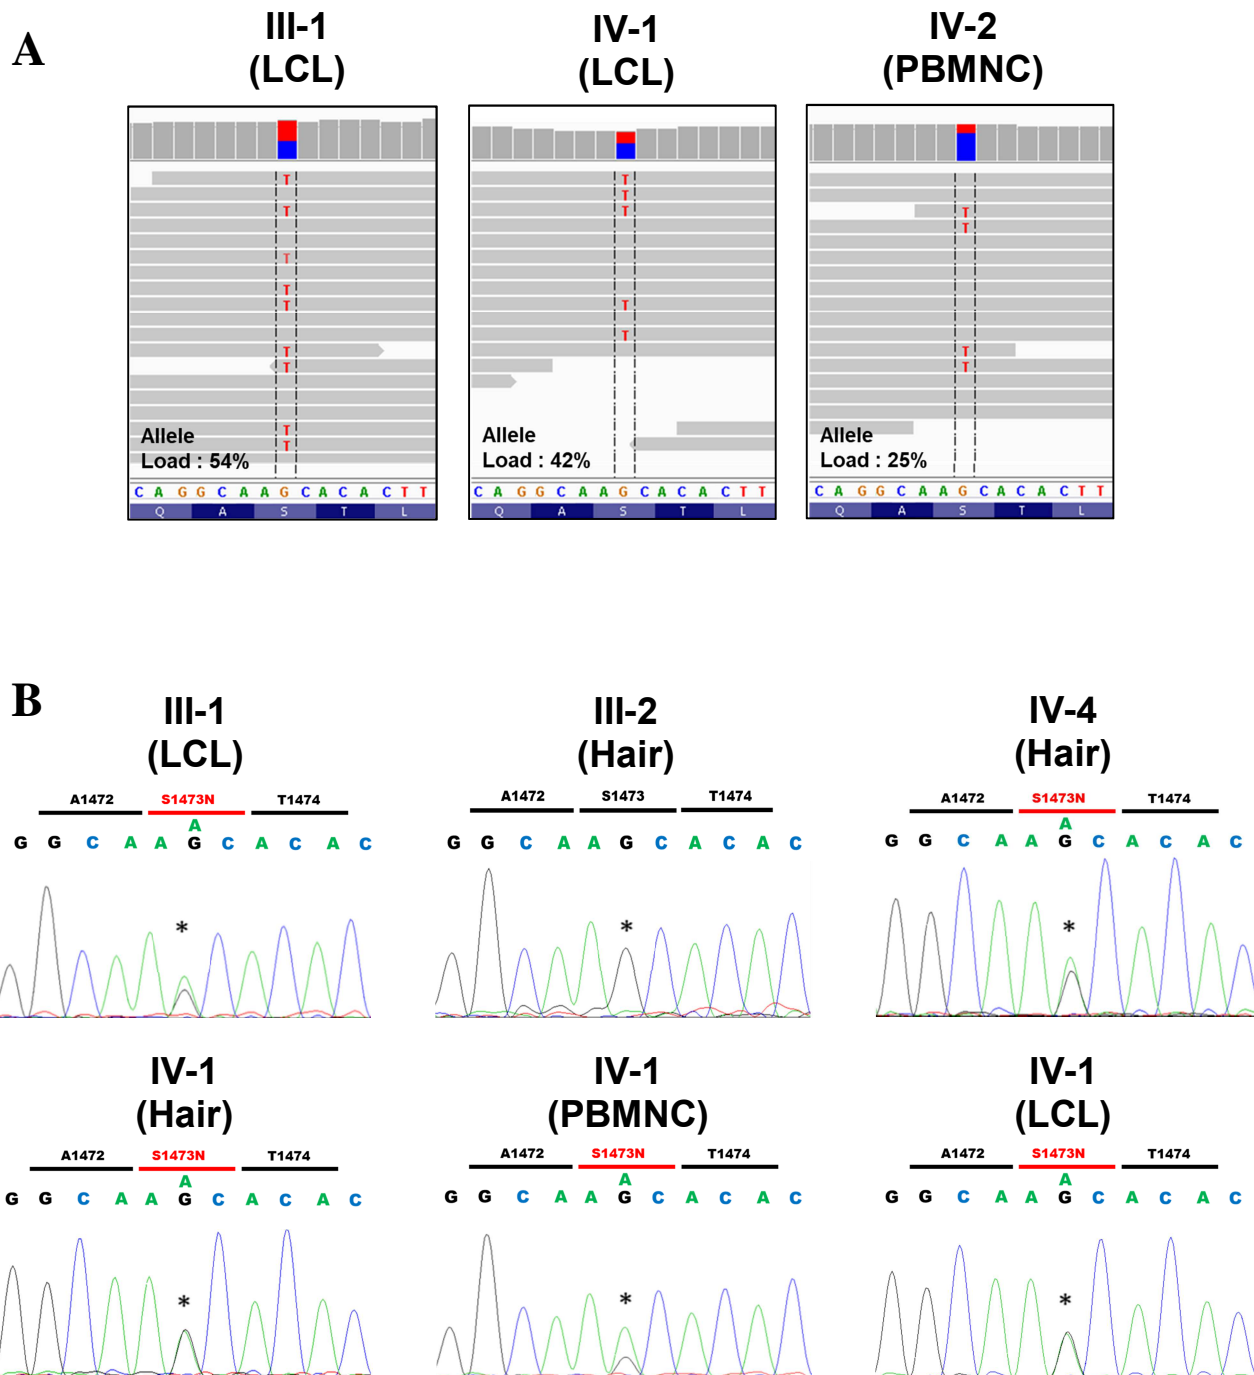

**Supplementary Figure 1.** Germline p.S1473N mutation identified in individuals with hematological diseases. (A) Whole exome sequencing of germline missense mutation SAMD9L S1473N (g.chr7:92760867C>T; c.4418G>A [NM\_152703.4]; p.Ser1473Asn [NP689916.2]) in individuals III-1, IV-1 and IV-2. A reduced variant allele frequency is seen for IV-2 with 25% mutant allele. (B) Sanger sequence confirmation of heterozygous germline SAMD9L S1473N mutant allele in affected individuals and wildtype genotype in unaffected mother.

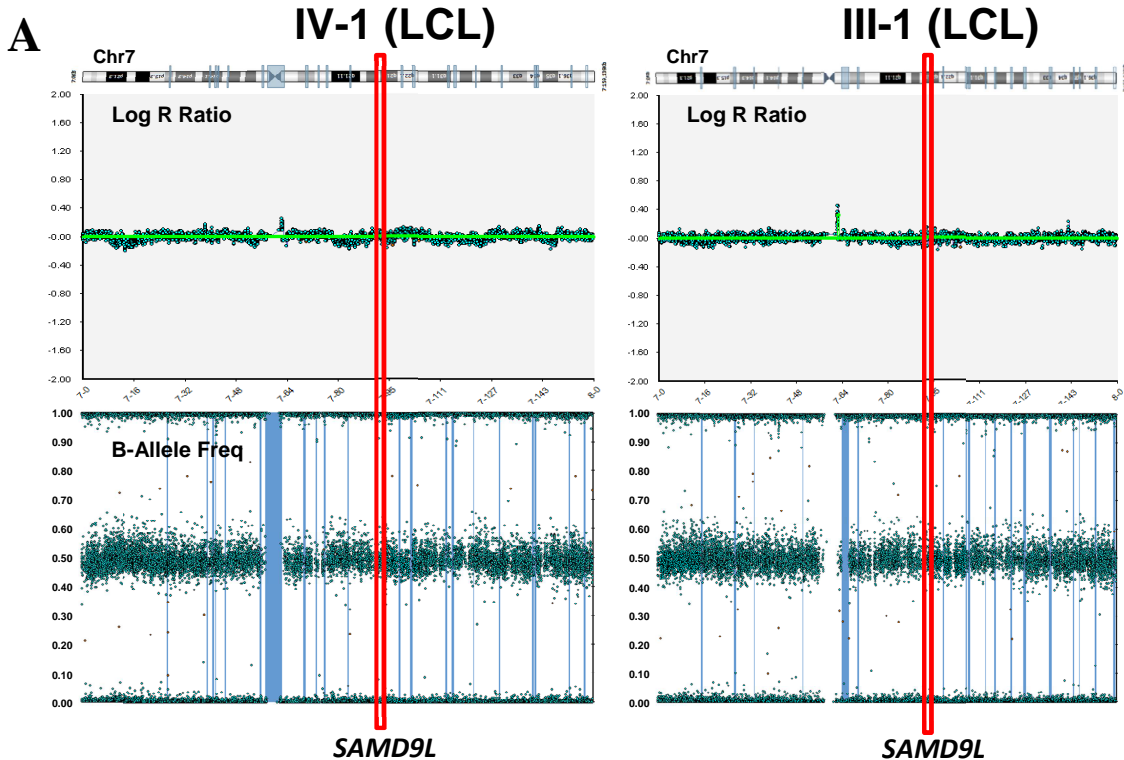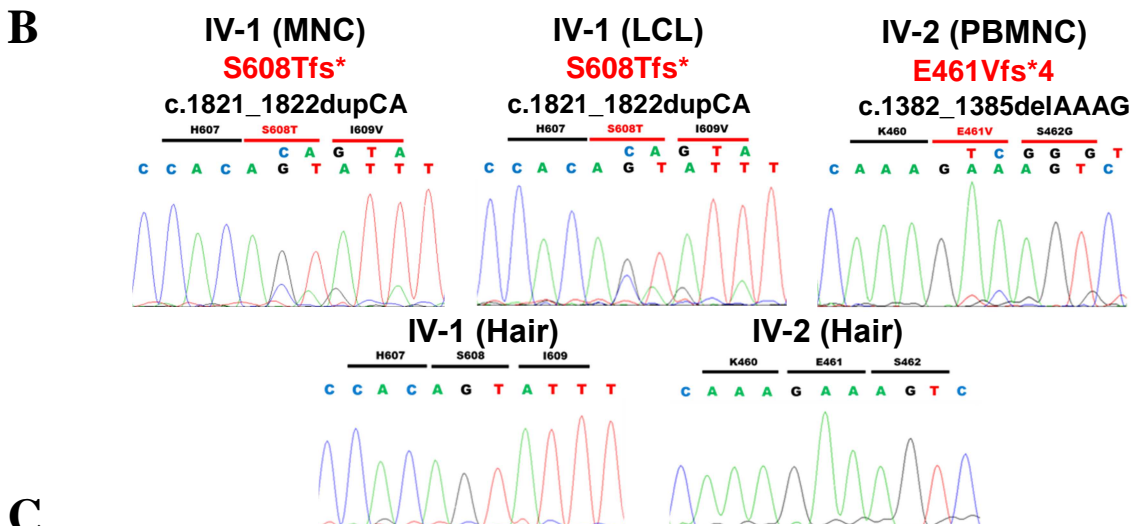

**C**

|                              | Germline        |                                  | Somatic                                          | Somatic                                         |
|------------------------------|-----------------|----------------------------------|--------------------------------------------------|-------------------------------------------------|
| <b>Genomic Configuration</b> | Wildtype        | Mutant                           | <i>In cis</i>                                    | <i>In trans</i> <sup>#</sup>                    |
| <b>Genotype</b>              | S1473 /S608     | <b>S1473N /S608</b>              | <b>S1473N /S608Tfs*6</b>                         | S1473 / <b>S608Tfs*6</b>                        |
| <b># of clones</b>           | <b>7</b>        | <b>2</b>                         | <b>7</b>                                         | <b>3</b>                                        |
| <b>Interpretation</b>        | Wildtype allele | Germline but no somatic mutation | Germline and somatic mutation on the same allele | Likely PCR artefact due to incomplete extension |

**Supplementary Figure 2.** Clonal reversion mechanisms of germline inherited mutations. (A) SNP array of Chromosome 7 in III-1 and IV-1. No chromosomal abnormalities seen compare to IV-2 in Figure 1D. (B). Sanger sequence confirmations of acquired *SAMD9L* mutations. (C) Clonal analysis of PCR amplified genomic DNA across *SAMD9L* mutation regions from IV-1 LCL. Genotyped clone proportions suggest germline p.S1473N mutation and upstream p.S608Tfs\*6 frameshift mutations are *in cis* configuration. #*In trans* configuration clonal analysis proposes that incomplete PCR extension occurred in 15% of clones. Bold= Colonies consistent with somatic mutation occurring on germline mutated allele with V.A.F from WES and SNP array.

**Supplementary Table 1. Individual IV-1 Transplant Conditioning Regime**

| <b>Day</b> | <b>Treatment</b>        | <b>Dose</b>         |
|------------|-------------------------|---------------------|
| <b>- 6</b> | Cyclophosphamide        | 60mg/m <sup>2</sup> |
|            | Anti-thymocyte Globulin | 15mg/kg twice a day |
| <b>- 5</b> | Cyclophosphamide        | 60mg/m <sup>2</sup> |
|            | Anti-thymocyte Globulin | 15mg/kg twice a day |
| <b>- 4</b> | Anti-thymocyte Globulin | 15mg/kg twice a day |
|            | Total Body Irradiation  |                     |
| <b>- 3</b> | Total Body Irradiation  |                     |
| <b>- 2</b> | Total Body Irradiation  |                     |
| <b>- 1</b> | Rest Day                |                     |
| <b>0</b>   | Cord Blood Transplant   |                     |
| <b>1</b>   | Methotrexate            | 15mg/m <sup>2</sup> |
| <b>3</b>   | Methotrexate            | 10mg/m <sup>2</sup> |
| <b>6</b>   | Methotrexate            | 10mg/m <sup>2</sup> |
| <b>11</b>  | Methotrexate            | 10mg/m <sup>2</sup> |



**Supplementary Table 2. Shortlist of predicted pathogenic segregating variants after WES data filtering**

| CHROM | POS       | Gene     | EFFECT_SNP EFF   | AA_CHANGE_SNP EFF      | ExAC_% | CADD  | GERP | OMIM_phenotypes                                                                                                                            |
|-------|-----------|----------|------------------|------------------------|--------|-------|------|--------------------------------------------------------------------------------------------------------------------------------------------|
| 6     | 107008769 | AIM1     | missense_variant | p.Arg1575Cys/c.4723C>T | 0.007  | 32.00 | 5.02 |                                                                                                                                            |
| 6     | 101090505 | ASCC3    | missense_variant | p.Ile1285Val/c.3853A>G | 0.021  | 23.20 | 5.15 |                                                                                                                                            |
| 2     | 179736230 | CCDC141  | missense_variant | p.Ala710Val/c.2129C>T  | 0.05   | 27.00 | 4.00 |                                                                                                                                            |
| 17    | 46051389  | CDK5RAP3 | missense_variant | p.Arg93Trp/c.277C>T    | 0.000  | 35.00 | 3.28 |                                                                                                                                            |
| 18    | 13087608  | CEP192   | missense_variant | p.Phe1986Leu/c.5956T>C | 0.001  | 29.20 | 5.76 |                                                                                                                                            |
| 1     | 60366747  | CYP2J2   | missense_variant | p.Ala407Val/c.1220C>T  | 0.002  | 33.00 | 5.72 |                                                                                                                                            |
| 16    | 70365692  | DDX19B   | missense_variant | p.Ser364Asn/c.1091G>A  | 0.082  | 25.40 | 4.89 |                                                                                                                                            |
| 16    | 72132927  | DHX38    | missense_variant | p.Arg289His/c.866G>A   | 0.034  | 18.82 | 3.92 |                                                                                                                                            |
| 1     | 167096611 | DUSP27   | missense_variant | p.Ser748Leu/c.2243C>T  | 0.005  | 18.18 | 4.82 |                                                                                                                                            |
| 2     | 63206344  | EHBP1    | missense_variant | p.Arg863Trp/c.2587C>T  | 0.027  | 34.00 | 5.86 | Prostate cancer, hereditary, 12                                                                                                            |
| 1     | 92732036  | GLMN     | missense_variant | p.Leu385Ser/c.1154T>C  | 0.000  | 31.00 | 5.82 | Glomuvenous malformations                                                                                                                  |
| 12    | 102811750 | IGF1     | missense_variant | p.Lys145Met/c.434A>T   | 0.006  | 27.90 | 5.54 | Growth retardation with deafness and mental retardation due to IGF1 deficiency                                                             |
| 6     | 129691121 | LAMA2    | missense_variant | p.Glu1649Gln/c.4945G>C | 0.007  | 23.00 | 5.98 | Muscular dystrophy, congenital, due to partial LAMA2 deficiency :: Muscular dystrophy, congenital merosin-deficient                        |
| 1     | 209797298 | LAMB3    | missense_variant | p.Thr675Met/c.2024C>T  | 0.009  | 11.12 | 3.06 | Epidermolysis bullosa, junctional, non-Herlitz type :: Amelogenesis imperfecta, type IA :: Epidermolysis bullosa, junctional, Herlitz type |
| 12    | 6626546   | NCAPD2   | missense_variant | p.Arg401Cys/c.1201C>T  | 0.001  | 35.00 | 4.55 |                                                                                                                                            |
| 2     | 26688865  | OTOF     | missense_variant | p.Arg1527His/c.4580G>A | 0.000  | 33.00 | 5.58 | Auditory neuropathy, autosomal recessive, 1 :: Deafness, autosomal recessive 9                                                             |
| 22    | 21742598  | RIMBP3B  | missense_variant | p.Arg1484Lys/c.4451G>A | 0.000  | 20.60 | 3.01 |                                                                                                                                            |
| 7     | 92760867  | SAMD9L   | missense_variant | p.Ser1473Asn/c.4418G>A | 0.000  | 17.47 | 3.23 | Ataxia-pancytopenia syndrome                                                                                                               |
| 1     | 153750994 | SLC27A3  | missense_variant | p.Arg518Gln/c.1553G>A  | 0.058  | 28.20 | 5.01 |                                                                                                                                            |

Heterozygous variants predicted to affect protein function , present in all affected individuals, and ExAC<0.1%, CADD>10, GERP>3.

**Supplementary Table 3. SAMD9L Variant reference list**

| Germline    | Paired Somatic     | Reference |
|-------------|--------------------|-----------|
| S626L       |                    | 2         |
| M840K       |                    | 3         |
| H880G       |                    | 7         |
| H880Q       | <b>Q569P</b>       | 10        |
| H880Q       | <b>S1317Rfs*21</b> | 11        |
| I891T       | <b>K768*</b>       | 6         |
| T951Nfs*3   |                    | 3         |
| R986C/T233N |                    | 6         |
| R986C       |                    | 11        |
| R986C       | <b>R223X</b>       | 10        |
| R986C       | <b>E276X</b>       | 10        |
| R986C       | <b>L402Rfs*8</b>   | 6         |
| R986C       | <b>Y568C</b>       | 10        |
| R986C       | <b>R843W</b>       | 10        |
| R986C       | <b>F1092L</b>      | 10        |
| R986C       | <b>A1113T</b>      | 3         |
| R986C       | <b>R1524H</b>      | 10        |
| R986H       |                    | 11        |
| D1034Y      |                    | 3         |
| S1143G      |                    | 3         |
| D1148H      |                    | 3         |
| W1180R      |                    | 2         |
| C1196S      |                    | 7         |
| R1281K      |                    | 2         |
| R1281K      | <b>V19E</b>        | 10        |
| R1281K      | <b>C228F</b>       | 10        |
| R1281K      | <b>A260T</b>       | 10        |
| R1281K      | <b>R285W</b>       | 10        |

| Germline | Paired Somatic            | Reference |
|----------|---------------------------|-----------|
| R1281K   | <b>R359Q</b>              | 10        |
| R1281K   | <b>V361Efs*10</b>         | 10        |
| R1281K   | <b>N499S</b>              | 10        |
| R1281K   | <b>E562K</b>              | 10        |
| R1281K   | <b>R589X</b>              | 10        |
| R1281K   | <b>E776Gfs*13</b>         | 10        |
| R1281K   | <b>R843W</b>              | 10        |
| R1281K   | <b>R986L</b>              | 10        |
| R1281K   | <b>T1053I</b>             | 10        |
| R1281K   | <b>F1092V</b>             | 10        |
| R1281K   | <b>T1122S</b>             | 10        |
| R1281K   | <b>T1122_G1124delinsS</b> | 10        |
| R1281K   | <b>L1153deIL</b>          | 10        |
| R1281K   | <b>D1171N</b>             | 10        |
| R1281K   | <b>Q1183X</b>             | 10        |
| R1281K   | <b>S1397P</b>             | 10        |
| R1281K   | <b>K1408Nfs*9</b>         | 10        |
| R1281K   | <b>L1455X</b>             | 10        |
| S1473N   | <b>S608Tfs*6</b>          | #         |
| S1473N   | <b>E461fs*43</b>          | #         |
| I1493V   |                           | 3         |
| V1512A   | <b>L409fs</b>             | 10        |
| V1512A   | <b>Q780X</b>              | 10        |
| V1512A   | <b>K1265N</b>             | 10        |
| V1512M   | <b>R1188X</b>             | 11        |
| L1521V   |                           | 3         |
| S1550P   |                           | 3         |

Refer to “Supplementary References” for indicated reference number. #: Identified in our study  
 Black: Germline mutation; Red: Somatic mutation

**Supplementary Table 4. SAMD9 Variant reference list**

| Germline   | Paired Somatic | Reference |
|------------|----------------|-----------|
| R459Q      |                | 8         |
| Y469C      | V853I          | 3         |
| Y469S      |                | 3         |
| K676E      |                | 10        |
| R685Q      |                | 8         |
| A722E      | R685*          | 4         |
| T728A      |                | 3         |
| D769N      |                | 9         |
| D769G      | Q39*           | 4         |
| Q776K      | D682G          | 3         |
| T778I      |                | 2         |
| N834Y      |                | 9         |
| E974K      |                | 9         |
| R982H      |                | 8         |
| R982C      | R1533fs*       | 8         |
| R982C      | K27fs*         | 8         |
| I983S      | N765Tfs*13     | 8         |
| I983V      |                | 3         |
| E1136Q     | F583I          | 5         |
| E1136Q     | R221fs*        | 5         |
| R1187Vfs*2 |                | 3         |
| A1195V     |                | 9         |
| P1280L     |                | 9         |
| Q1286K     |                | 9         |
| R1293W     |                | 9         |
| R1293Q     |                | 8         |
| L1569N     | R344fs*        | 8         |

Refer to “Supplementary References” for indicated reference number.  
 Black: Germline mutation; Red: Somatic mutation
