# Supplementary material
Source: PubMed Central journal article supplement (PMC6601105)
Supplement: 2018_207316-Disclosures_and_Contributions.pdf [file 2018_207316-Disclosures_and_Contributions.pdf]

Haematologica  
HAEMATOL/2018/207316  
Version 4

A novel germline SAMD9L mutation in a family with  
ataxia-pancytopenia syndrome and pediatric acute lymphoblastic  
leukemia

Jesse J.C. Cheah, Anna L. Brown, Andreas W. Schreiber, Jinghua  
Feng, Milena Babic, Sarah Moore, Chun-Chun Young, Miriam Fine,  
Kerry Phillips, Michael Guandalini, Peter Wilson, Nicola Poplawski,  
Christopher N. Hahn, and Hamish S. Scott

Disclosures: Anna Brown received honoraria from Novartis. Hamish S Scott received honoraria from Celgene.

Contributions: Jesse JC Cheah = Performed the research, collected and analysed data, and wrote the paper. Anna L Brown = Collected and analysed data and wrote the paper. Andreas W Schreiber = Analysed bioinformatics research data. Jinghua Feng = Analysed bioinformatics research data. Milena Babic = Collected and prepared samples. Sarah Moore = Performed and analysed array data. Chun-Chun Young = Performed and analysed array data. Miriam Fine = Recruited patients and collected data. Kerry Phillips = Recruited patients and collected data. Michael Guandalini = Performed, collected and analysed MRI data. Peter Wilson = Analysed and collected data. Nicola Poplawski = Recruited patients and collected data. Christopher N Hahn = Designed the study and critically reviewed the paper. Hamish S Scott = Designed the study and critically reviewed the paper.
